# Supplementary material
Source: MDPI journal article supplement (https://www.mdpi.com/2078-1547/13/2/39)
Supplement: s1 [file s1]

# Ethical principles

## Policy statement

© World Physiotherapy 2019  
[www.world.physio](http://www.world.physio)



---

# Ethical principles

The World Confederation for Physical Therapy (WCPT) expects physical therapists to:

- respect the rights, personal dignity, privacy and autonomy of all individuals
  - comply with the laws and regulations governing the practice of physical therapy in the country in which they practise and the policies of their professional associations and regulatory bodies
  - accept responsibility for the exercise of sound professional judgement
  - provide honest, competent and accountable professional services
  - provide fair, equitable, inclusive and quality services
  - charge and receive a just and fair level of remuneration for their services
  - provide accurate and appropriate information to patients/clients,<sup>1</sup> to other agencies and the community about physical therapy
  - contribute to the planning and development of services which address the health needs of the community
- 

**Glossary** ([www.world.physio/resources/glossary](http://www.world.physio/resources/glossary))

**Equity**

**Inclusion**

**Service standards**

**Standards of practice**

| Approval, review and related policy information |                                                                                                                                                                                                                                                                                                                                                                                                                                                                              |
|-------------------------------------------------|------------------------------------------------------------------------------------------------------------------------------------------------------------------------------------------------------------------------------------------------------------------------------------------------------------------------------------------------------------------------------------------------------------------------------------------------------------------------------|
| <b>Date adopted:</b>                            | Originally adopted at the 13th General Meeting of WCPT June 1995 as a Declaration of Principle and accompanying appendix.<br>Declaration revised and re-approved at the 16th General Meeting of WCPT June 2007.<br>Ethical principles approved at the 17th General Meeting of WCPT, June 2011, with an accompanying policy statement.<br>Re-approved at the 18th General Meeting of WCPT May 2015.<br>Reviewed and re-approved at the 19th General Meeting of WCPT May 2019. |
| <b>Date for review:</b>                         | 2023                                                                                                                                                                                                                                                                                                                                                                                                                                                                         |
| <b>Related WCPT Policy material:</b>            | WCPT policy statements: <ul style="list-style-type: none"><li>• Ethical responsibilities of physical therapists and WCPT members</li></ul> WCPT endorsements: <ul style="list-style-type: none"><li>• Endorsement: Rights of the child</li><li>• Endorsement: The United Nations standard rules on the equalisation of opportunities for persons with disabilities</li></ul>                                                                                                 |

© World Confederation for Physical Therapy 2019

---

<sup>1</sup> The term patient/client is used in this document as a generic term to refer to individuals and groups of individuals who can benefit from physical therapy interventions/treatments.
